# Supplementary material for: Isolation of Cellulose Nanocrystals from Banana Peel Using One-Pot Microwave and Mild Oxidative Hydrolysis System
Source: MDPI journal article supplement (doi:10.3390/nano12193537), 2022-10-10
Supplement: s1 [file s1]

# Isolation of Cellulose Nanocrystals from Banana Peel Using One-Pot Microwave and Mild Oxidative Hydrolysis System

Nurhidayah Azmirah Mohd Jamil <sup>1,2</sup>, Syafiqah Syazwani Jaffar <sup>1</sup>, Suryani Saallah <sup>1,\*</sup>,  
Mailin Misson <sup>1</sup>, Shafiquzzaman Siddiquee <sup>1</sup>, Jumardi Roslan <sup>3</sup> and Wuled Lenggoro <sup>4</sup>

<sup>1</sup> Biotechnology Research Institute, Universiti Malaysia Sabah, Jalan UMS, Kota Kinabalu 88400, Sabah, Malaysia

<sup>2</sup> Marine Aquaculture Development Centre Menggatal, Department of Fisheries Sabah, Jalan Sepanggar, Kota Kinabalu 88450, Sabah, Malaysia

<sup>3</sup> Faculty of Food Science and Nutrition, Universiti Malaysia Sabah, Jalan UMS, Kota Kinabalu 88400, Sabah, Malaysia

<sup>4</sup> Institute of Engineering, Tokyo University of Agriculture and Technology, 2-24-16 Nakacho, Koganei, Tokyo 184-8588, Japan

\* Correspondence: suryani@ums.edu.my

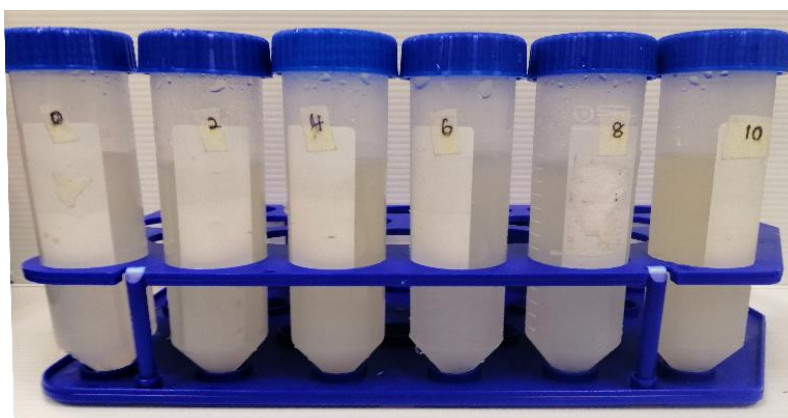

**Figure S1.** Suspensions obtained after the H<sub>2</sub>O<sub>2</sub>-pre-treated banana peel samples were subjected to acid hydrolysis at concentration ranging from 0% (control) to 10%.
